# Supplementary material
Source: ML conference proceedings conference paper supplement (https://proceedings.neurips.cc/paper_files/paper/2019/hash/1f88c7c5d7d94ae08bd752aa3d82108b-Abstract.html)
Supplement: Supplementary file [file 1f88c7c5d7d94ae08bd752aa3d82108b-Supplemental.zip]

# Supplemental Materials

## Overview

This codebase contains implementations for “Chirality Nets for Human Pose Regression”.

- Chiral layers are implemented under `pose_chiral/chiral_layers`.
- A tutorial on chirality equivariance is under `demo/`.
- Test cases are implemented under `tests/`.

Submitted to 33rd Conference on Neural Information Processing Systems (NeurIPS 2019). Do not distribute.

## Dependencies

- Python 3+
- Pytorch  $\geq 1.0$
- unittest

## How to run tests

Run the following in the `supp_code` directory. `~ nosetests -nocapture ~`

## Expected results.

Tests batchnorm equivariance at test time.  
Difference expected chiral pairs: 0.0

.Tests batchnorm running mean and var updates.  
.Test equivariance for conv1d layer, different in/out sym\_group.  
Difference expected chiral pairs: 1.1701751e-13

.Test equivariance for conv1d layer, sym\_group [1,1,1].  
Difference expected chiral pairs: 6.711298e-14

.Test equivariance for conv1d layer, sym\_group [2,2,1].  
Difference expected chiral pairs: 2.1044277e-13

.Tests equivariance on linear layer.  
Difference expected chiral pairs: 0.0

.Tests equivariance of GRU.  
Difference expected chiral pairs: 2.6402491e-15

.Tests equivariance of LSTM.  
Difference expected chiral pairs: 3.608225e-15

.  
-----  
Ran 8 tests in 0.225s

OK
